# Supplementary material for: Deciphering the Role of π-Interactions in Polyelectrolyte Complexes Using Rationally Designed Peptides
Source: MDPI journal article supplement (doi:10.3390/polym13132074), 2021-06-24
Supplement: s1 [file s1]

## Supplementary Information

# Deciphering the Role of $\pi$ -Interactions in Polyelectrolyte Complexes using Rationally Designed Peptides

Sara Tabandeh <sup>1</sup>, Cristina Lemus <sup>2</sup> and Lorraine Leon <sup>1,3\*</sup>

1 Department of Materials Science and Engineering, University of Central Florida, Orlando, FL, USA;

2 Department of Chemistry, University of Central Florida, Orlando, FL, USA;

3 NanoScience Technology Center, University of Central Florida, Orlando, FL, USA;

\* Correspondence: lorraine.leon@ucf.edu; Tel.: +1-407-823-5378

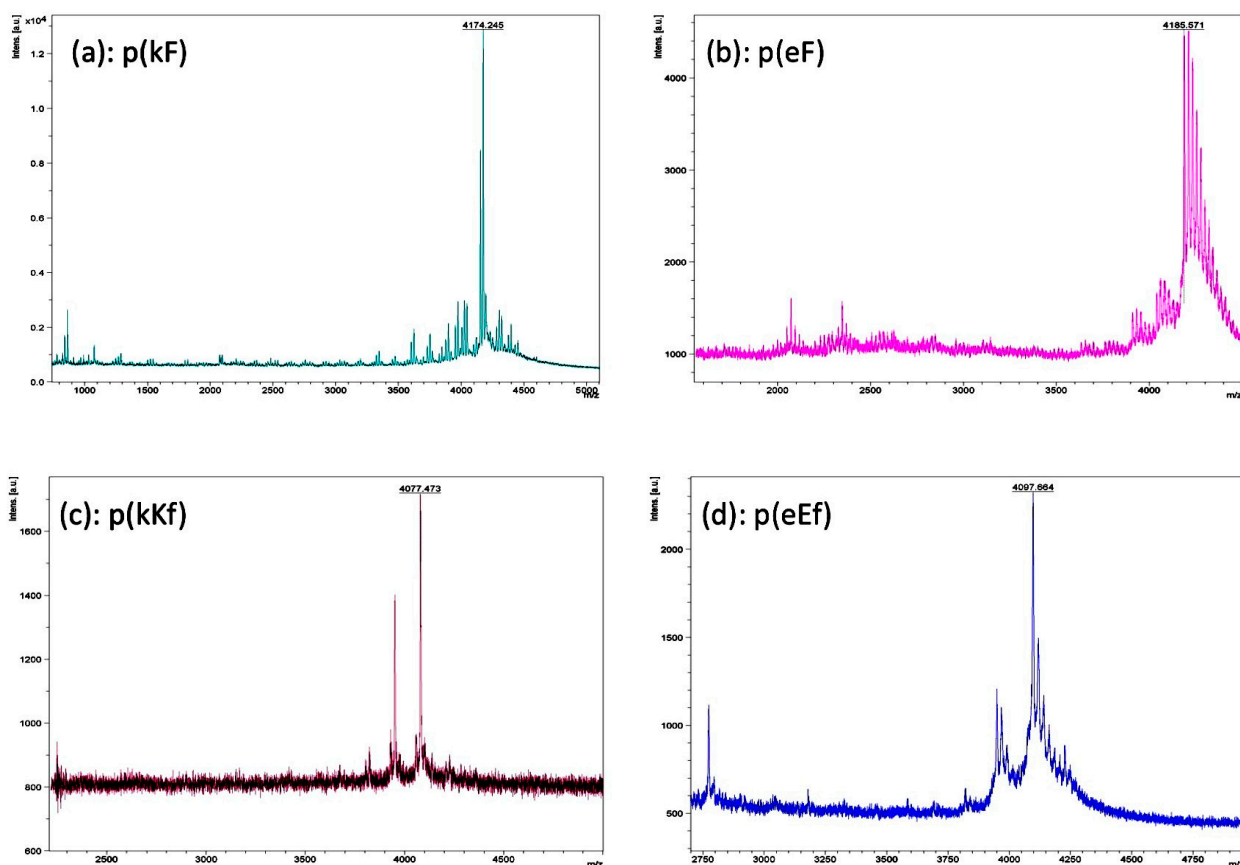

Figure S1. MALDI-TOF mass spectroscopy of the peptide sequences: (a) p(kF); (b) p(eF); (c) p(kKf); (d) p(eEf).

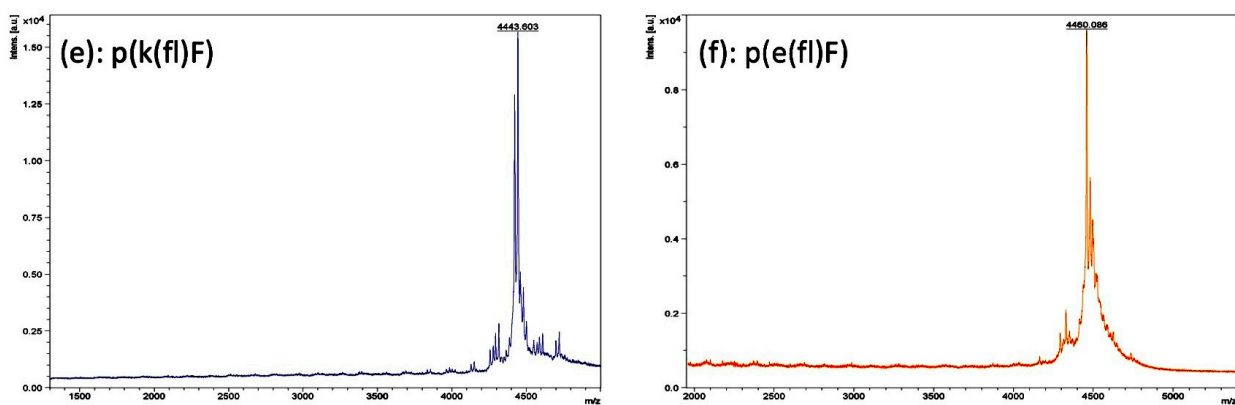

**Figure S1. Continued.** MALDI-TOF mass spectroscopy of the peptide sequences: (e) p(k(fl)F); (f) p(e(fl)F).

**Table S1.** Mass-to-charge ratio measurements using MALDI-TOF spectroscopy and the theoretical mass of sequence pairs. K and E refers to lysine and glutamic acid, respectively. F shows phenylalanine and (fl)F represents 4-fluoro-phenylalanine. Lower and upper cases are representative of D and L chirality, respectively.

| Polycations            | m/z (g/mol) | Theoretical mass (g/mol) | Polyanions             | m/z (g/mol) | Theoretical mass (g/mol) |
|------------------------|-------------|--------------------------|------------------------|-------------|--------------------------|
| (kF) <sub>15</sub>     | 4174.24     | 4147.22                  | (eF) <sub>15</sub>     | 4185.57     | 4161.34                  |
| (kKfKkF) <sub>5</sub>  | 4077.47     | 4052.21                  | (eEfEeF) <sub>5</sub>  | 4097.66     | 4071.04                  |
| (k(fl)F) <sub>15</sub> | 4443.6      | 4417.1                   | (e(fl)F) <sub>15</sub> | 4460.08     | 4431.2                   |



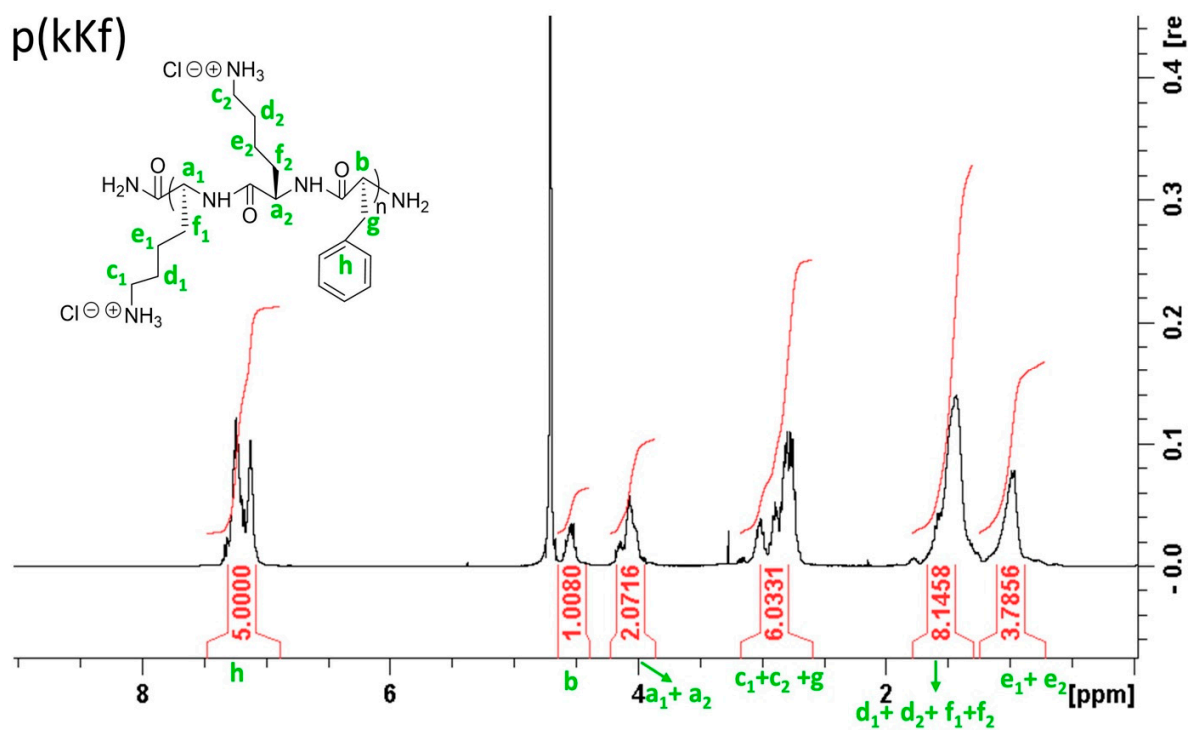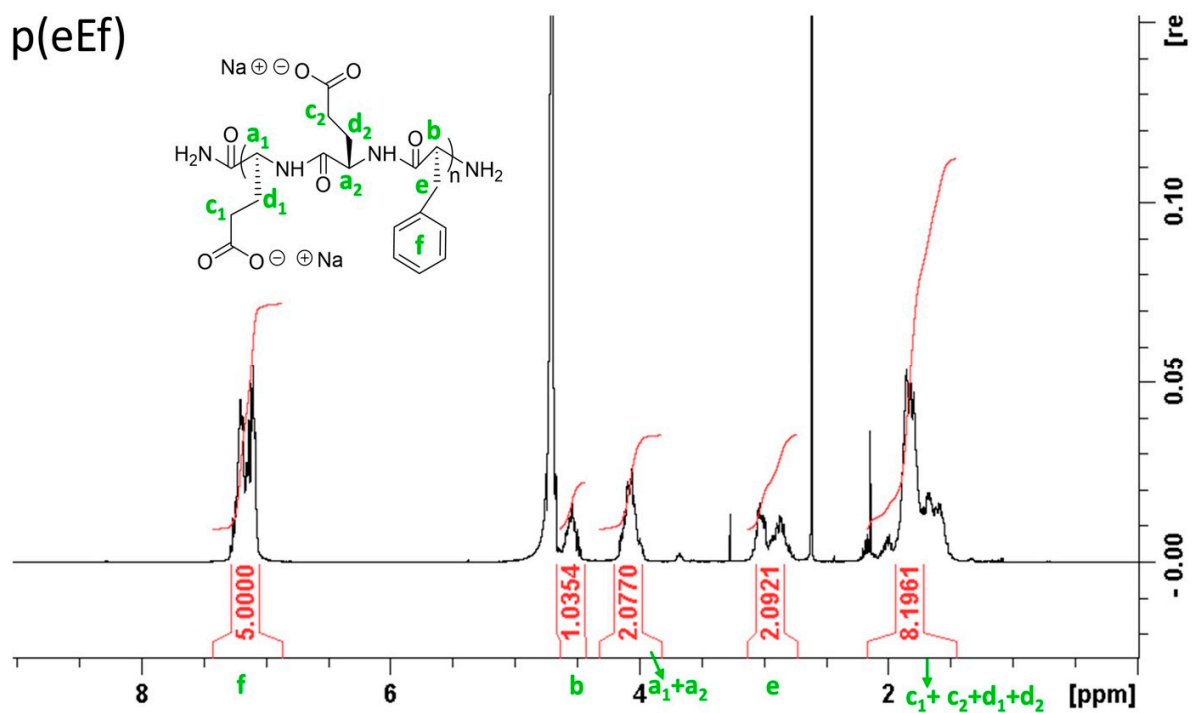

**Figure S2. Continued.**  $^1\text{H}$  NMR spectroscopy of the peptide sequences: p(kKf) on top; p(eEf) on bottom.

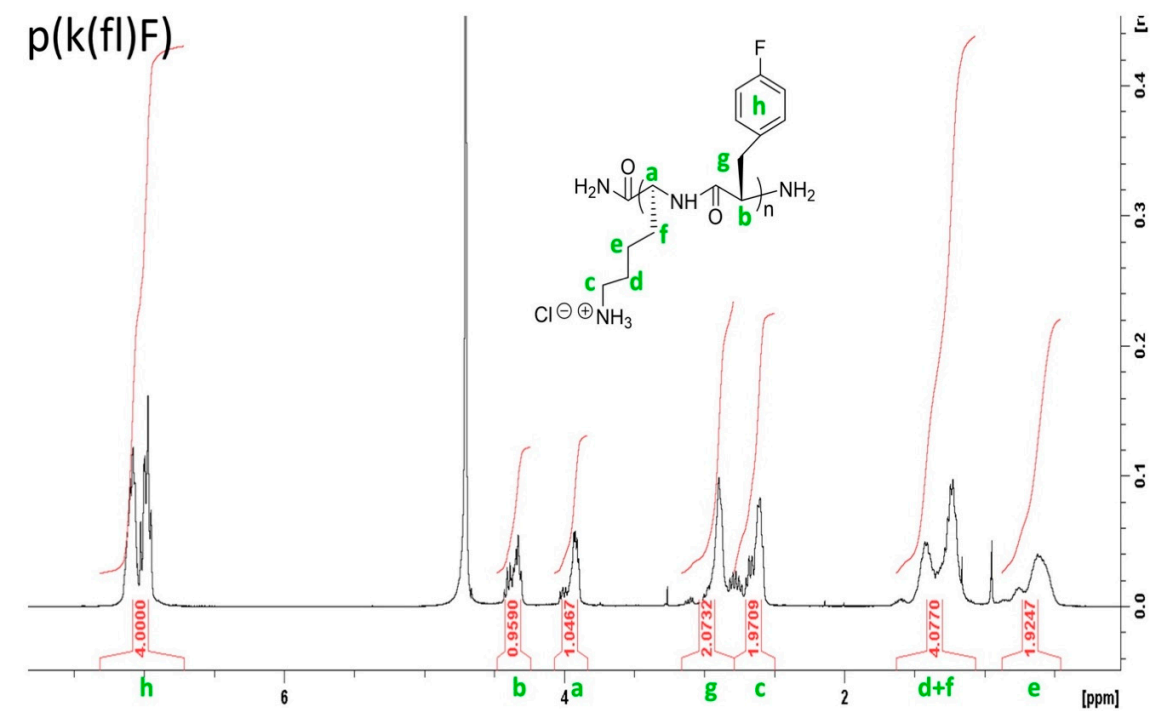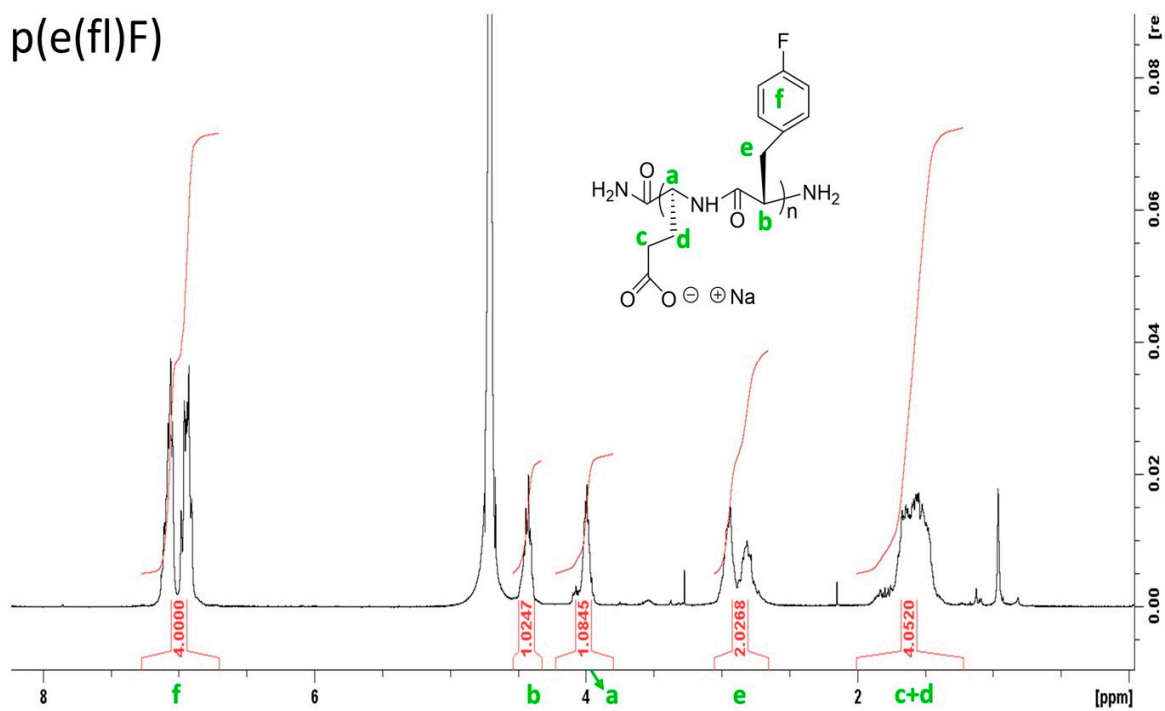

Figure S2. Continued. <sup>1</sup>H NMR spectroscopy of the peptide sequences: p(k(fl)F) on top; p(e(fl)F) on bottom.

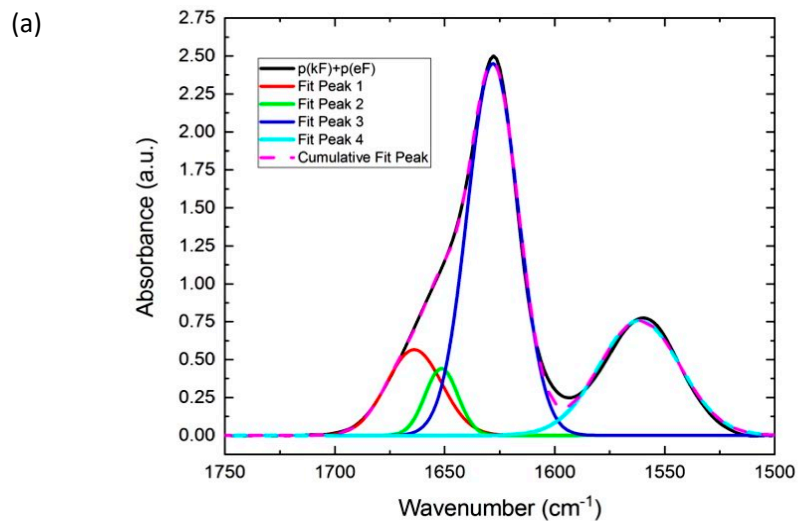

| Model        | Gauss                                                |                     |                     |                     |
|--------------|------------------------------------------------------|---------------------|---------------------|---------------------|
| Equation     | $y=y_0 + (A/(w*\sqrt{\pi/2}))*\exp(-2*((x-xc)/w)^2)$ |                     |                     |                     |
| Plot         | Peak1(Subtracted_D                                   | Peak2(Subtracted_D  | Peak3(Subtracted_D  | Peak4(Subtracted_D  |
| y0           | 6.00832E-4 ± 0.0040                                  | 6.00832E-4 ± 0.0040 | 6.00832E-4 ± 0.0040 | 6.00832E-4 ± 0.0040 |
| xc           | 1663.91261 ± 4.9707                                  | 1651.50362 ± 0.6854 | 1628.06371 ± 0.1881 | 1561.43812 ± 0.1962 |
| w            | 25.21832 ± 4.11307                                   | 14.86012 ± 2.61845  | 23.27326 ± 0.24485  | 36.65928 ± 0.47028  |
| A            | 17.86613 ± 6.98907                                   | 8.19766 ± 6.08477   | 71.4268 ± 1.11909   | 34.819 ± 0.49278    |
| Reduced Chi- | 7.27925E-4                                           |                     |                     |                     |
| R-Square (C  | 0.99836                                              |                     |                     |                     |
| Adj. R-Squar | 0.99824                                              |                     |                     |                     |

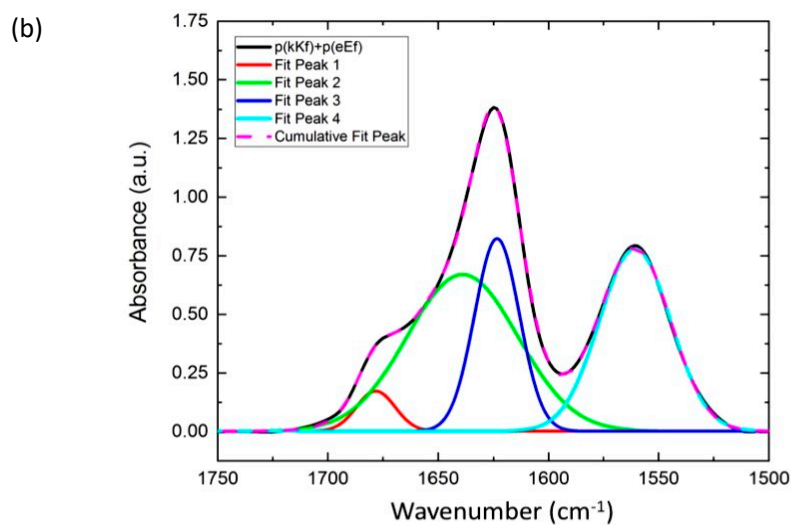

| Model           | Gauss                                                |                      |                      |                      |
|-----------------|------------------------------------------------------|----------------------|----------------------|----------------------|
| Equation        | $y=y_0 + (A/(w*\sqrt{\pi/2}))*\exp(-2*((x-xc)/w)^2)$ |                      |                      |                      |
| Plot            | Peak1(kKf-eEf)                                       | Peak2(kKf-eEf)       | Peak3(kKf-eEf)       | Peak4(kKf-eEf)       |
| y0              | 0.00131 ± 9.73405E-4                                 | 0.00131 ± 9.73405E-4 | 0.00131 ± 9.73405E-4 | 0.00131 ± 9.73405E-4 |
| xc              | 1678.28872 ± 0.1623                                  | 1638.99106 ± 0.43008 | 1623.38602 ± 0.05508 | 1560.73202 ± 0.05283 |
| w               | 17.39928 ± 0.61039                                   | 50.06638 ± 0.56668   | 20.35881 ± 0.1679    | 32.30035 ± 0.11489   |
| A               | 3.73975 ± 0.27194                                    | 41.96808 ± 0.33379   | 20.98087 ± 0.42499   | 31.54948 ± 0.11605   |
| Reduced Chi-Sqr | 3.68964E-5                                           |                      |                      |                      |
| R-Square (COD)  | 0.99976                                              |                      |                      |                      |
| Adj. R-Square   | 0.99975                                              |                      |                      |                      |

**Figure S3.** Deconvolution analysis of the FTIR spectra of sequence pairs: (a) p(kF)+p(eF); (b) p(kKf)+p(eEf).

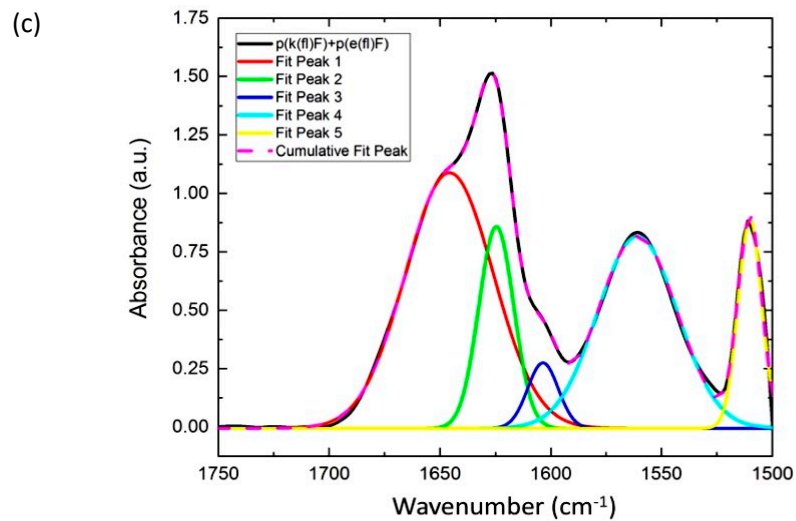

| Model         | Gauss                                                |                    |                    |                    |                    |
|---------------|------------------------------------------------------|--------------------|--------------------|--------------------|--------------------|
| Equation      | $y=y_0 + (A/(w*\sqrt{\pi/2}))*\exp(-2*((x-xc)/w)^2)$ |                    |                    |                    |                    |
| Plot          | Peak1(B)                                             | Peak2(B)           | Peak3(B)           | Peak4(B)           | Peak5(B)           |
| y0            | -0.00566 ± 0.00295                                   | -0.00566 ± 0.00295 | -0.00566 ± 0.00295 | -0.00566 ± 0.00295 | -0.00566 ± 0.00295 |
| xc            | 1645.80644 ± 0.59                                    | 1624.62544 ± 0.141 | 1603.56547 ± 0.41  | 1560.82213 ± 0.130 | 1510.11041 ± 0.059 |
| w             | 39.54028 ± 0.7707                                    | 15.79867 ± 0.47961 | 13.86388 ± 0.7885  | 35.86941 ± 0.31727 | 10.73307 ± 0.12694 |
| A             | 54.24409 ± 1.5229                                    | 17.10645 ± 1.15945 | 4.87106 ± 0.37774  | 37.02621 ± 0.33381 | 12.0056 ± 0.13519  |
| Reduced Chi-S | 3.07598E-4                                           |                    |                    |                    |                    |
| R-Square (CO  | 0.99845                                              |                    |                    |                    |                    |
| Adj. R-Square | 0.99831                                              |                    |                    |                    |                    |

**Figure S3. Continued.** Deconvolution analysis of the FTIR spectra of sequence pairs: (c)  $p(k(fl)F)+p(e(fl)F)$ .

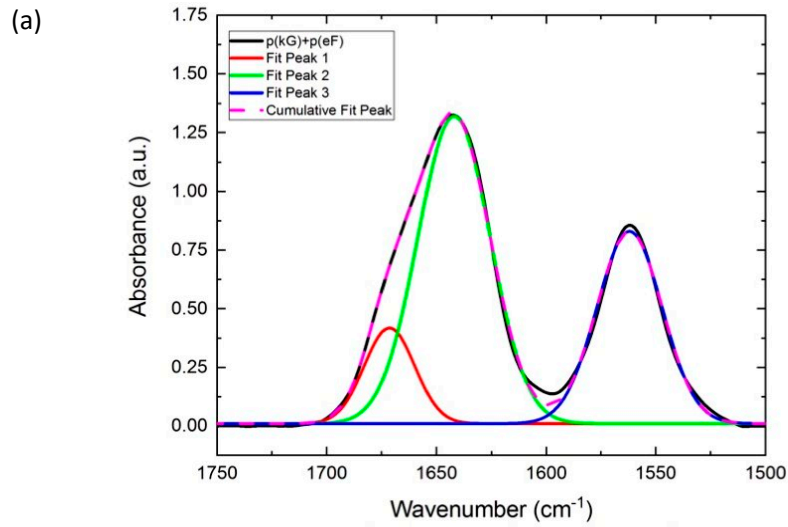

| Model           | Gauss                                                |                           |                           |
|-----------------|------------------------------------------------------|---------------------------|---------------------------|
| Equation        | $y=y_0 + (A/(w*\sqrt{\pi/2}))*\exp(-2*((x-xc)/w)^2)$ |                           |                           |
| Plot            | Peak1(Subtracted_Data Y1)                            | Peak2(Subtracted_Data Y1) | Peak3(Subtracted_Data Y1) |
| y0              | 0.0098 ± 0.00257                                     | 0.0098 ± 0.00257          | 0.0098 ± 0.00257          |
| xc              | 1671.38892 ± 0.66241                                 | 1642.01808 ± 0.36308      | 1561.97844 ± 0.11296      |
| w               | 22.87895 ± 0.86115                                   | 32.94812 ± 0.48197        | 29.74486 ± 0.25756        |
| A               | 11.69357 ± 1.04383                                   | 54.09945 ± 1.08405        | 30.57452 ± 0.28098        |
| Reduced Chi-Sqr | 3.56696E-4                                           |                           |                           |
| R-Square (COD)  | 0.99803                                              |                           |                           |
| Adj. R-Square   | 0.99793                                              |                           |                           |

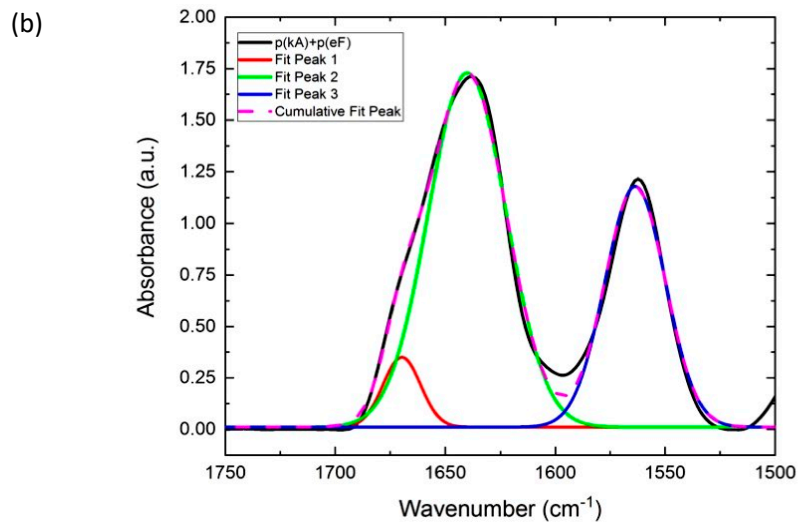

| Model         | Gauss                                                |                           |                           |
|---------------|------------------------------------------------------|---------------------------|---------------------------|
| Equation      | $y=y_0 + (A/(w*\sqrt{\pi/2}))*\exp(-2*((x-xc)/w)^2)$ |                           |                           |
| Plot          | Peak1(Subtracted_Data Y1)                            | Peak2(Subtracted_Data Y1) | Peak3(Subtracted_Data Y1) |
| y0            | 0.01094 ± 0.00548                                    | 0.01094 ± 0.00548         | 0.01094 ± 0.00548         |
| xc            | 1669.73781 ± 0.73143                                 | 1640.0313 ± 0.3659        | 1563.61066 ± 0.17532      |
| w             | 17.02292 ± 1.57748                                   | 35.37954 ± 0.64994        | 27.52006 ± 0.38782        |
| A             | 7.23435 ± 1.23582                                    | 76.18935 ± 1.47407        | 40.29908 ± 0.58329        |
| Reduced Chi-S | 0.00187                                              |                           |                           |
| R-Square (CO) | 0.99406                                              |                           |                           |
| Adj. R-Square | 0.99374                                              |                           |                           |

**Figure S4.** Deconvolution analysis of the FTIR spectra of sequence pairs: (a) p(kG)+p(eF); (b) p(kA)+p(eF).



(c)

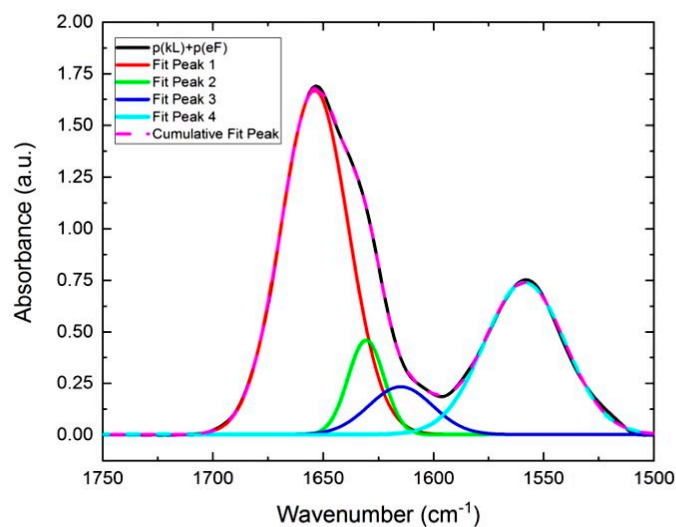

| Model        | Gauss                                                |                    |                    |                    |
|--------------|------------------------------------------------------|--------------------|--------------------|--------------------|
| Equation     | $y=y_0 + (A/(w*\sqrt{\pi/2}))*\exp(-2*((x-xc)/w)^2)$ |                    |                    |                    |
| Plot         | Peak1(Subtracted_D                                   | Peak2(Subtracted_D | Peak3(Subtracted_D | Peak4(Subtracted_D |
| y0           | 0.00169 ± 0.00122                                    | 0.00169 ± 0.00122  | 0.00169 ± 0.00122  | 0.00169 ± 0.00122  |
| xc           | 1653.88653 ± 0.142                                   | 1630.61949 ± 0.220 | 1614.90611 ± 3.393 | 1558.56844 ± 0.102 |
| w            | 30.48472 ± 0.17439                                   | 16.25656 ± 0.70456 | 28.96307 ± 3.69549 | 36.60387 ± 0.2229  |
| A            | 63.62833 ± 0.59346                                   | 9.33123 ± 1.56434  | 8.40842 ± 1.97828  | 33.86951 ± 0.21007 |
| Reduced Chi  | 6.96646E-5                                           |                    |                    |                    |
| R-Square (C  | 0.99974                                              |                    |                    |                    |
| Adj. R-Squar | 0.99972                                              |                    |                    |                    |

(d)

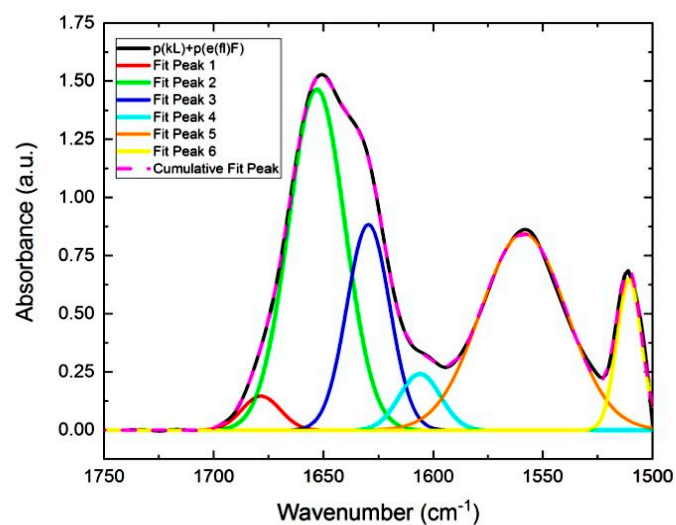

| Model        | Gauss                                                |                    |                    |                    |                    |                    |
|--------------|------------------------------------------------------|--------------------|--------------------|--------------------|--------------------|--------------------|
| Equation     | $y=y_0 + (A/(w*\sqrt{\pi/2}))*\exp(-2*((x-xc)/w)^2)$ |                    |                    |                    |                    |                    |
| Plot         | Peak1(Subtracted_                                    | Peak2(Subtracted_  | Peak3(Subtracted_  | Peak4(Subtracted_  | Peak5(Subtracted_  | Peak6(Subtracted_  |
| y0           | -0.00157 ± 0.00208                                   | -0.00157 ± 0.00208 | -0.00157 ± 0.00208 | -0.00157 ± 0.00208 | -0.00157 ± 0.00208 | -0.00157 ± 0.00208 |
| xc           | 1678.40799 ± 2.44                                    | 1653.09634 ± 0.76  | 1629.59367 ± 0.86  | 1606.03952 ± 1.30  | 1558.79823 ± 0.10  | 1510.64028 ± 0.05  |
| w            | 17.38733 ± 2.4091                                    | 25.67835 ± 2.3417  | 19.5602 ± 1.51966  | 18.72926 ± 1.6024  | 39.10723 ± 0.2740  | 11.24318 ± 0.1280  |
| A            | 3.2014 ± 1.69556                                     | 47.17189 ± 5.5757  | 21.70694 ± 4.6811  | 5.69398 ± 0.90099  | 41.53555 ± 0.2818  | 9.16533 ± 0.10215  |
| Reduced Chi  | 1.5034E-4                                            |                    |                    |                    |                    |                    |
| R-Square (C  | 0.99934                                              |                    |                    |                    |                    |                    |
| Adj. R-Squar | 0.99926                                              |                    |                    |                    |                    |                    |

Figure S4. Continued. Deconvolution analysis of the FTIR spectra of sequence pairs: (c) p(kL)+p(eF); (d) p(kL)+p(e(f)F).

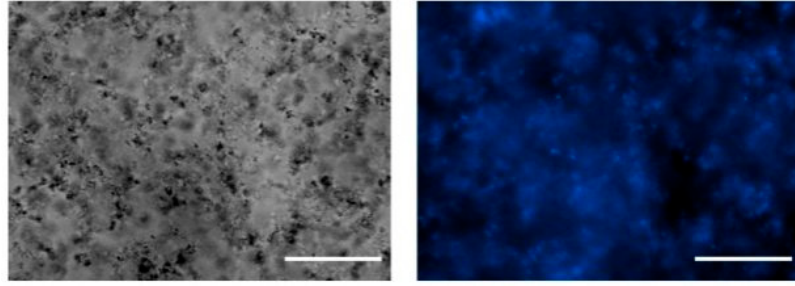

**Figure S5.** Optical and fluorescence imaging of p(kL)+p(e(fl)F) with thioflavin T (ThT). Scale bars, 50  $\mu$ m.

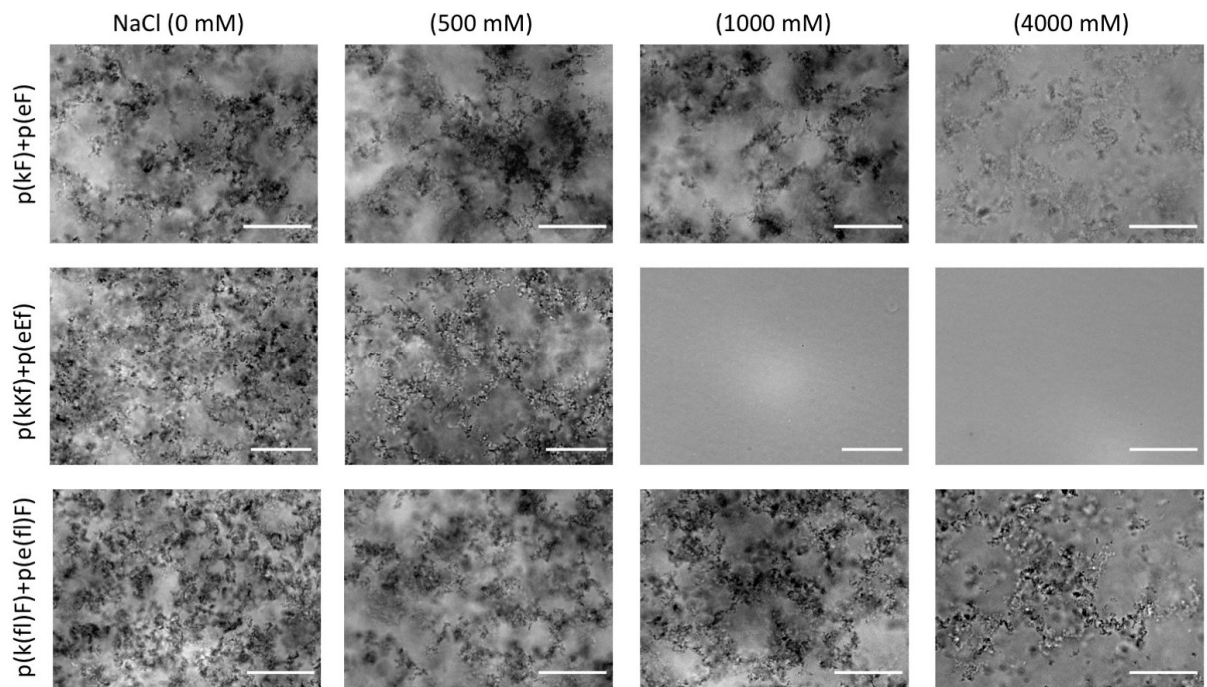

**Figure S6.** Optical micrographs (bright-field) of sequence pairs at varied salt (NaCl) concentrations. Scale bars, 50  $\mu$ m.

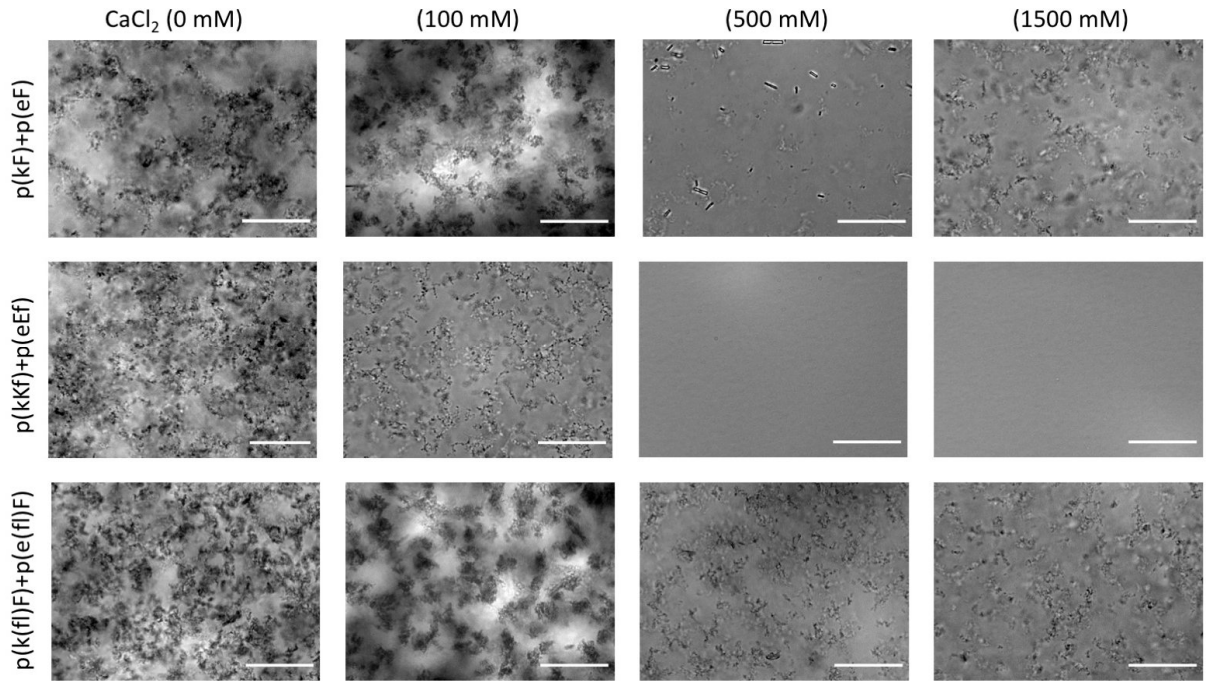

**Figure S6. Continued.** Optical micrographs (bright-field) of sequence pairs at varied salt (CaCl<sub>2</sub>) concentrations. Scale bars, 50  $\mu$ m.

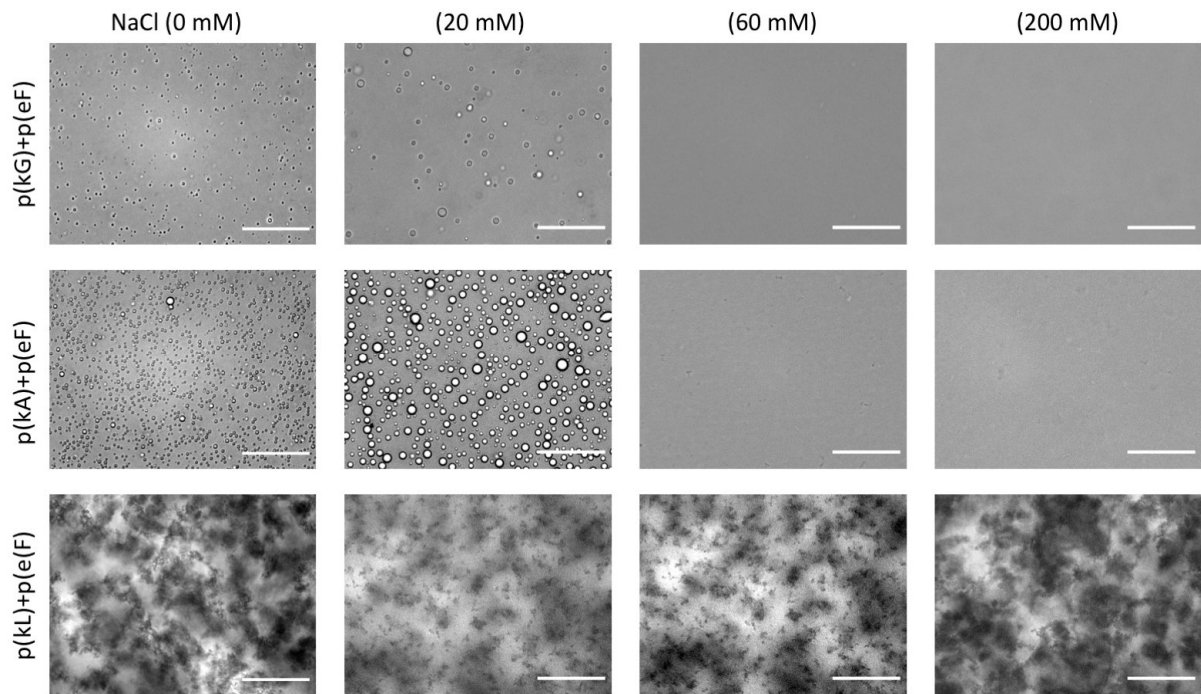

**Figure S7.** Optical micrographs (bright-field) of sequence pairs at varied salt (NaCl) concentrations. Scale bars, 50  $\mu$ m.

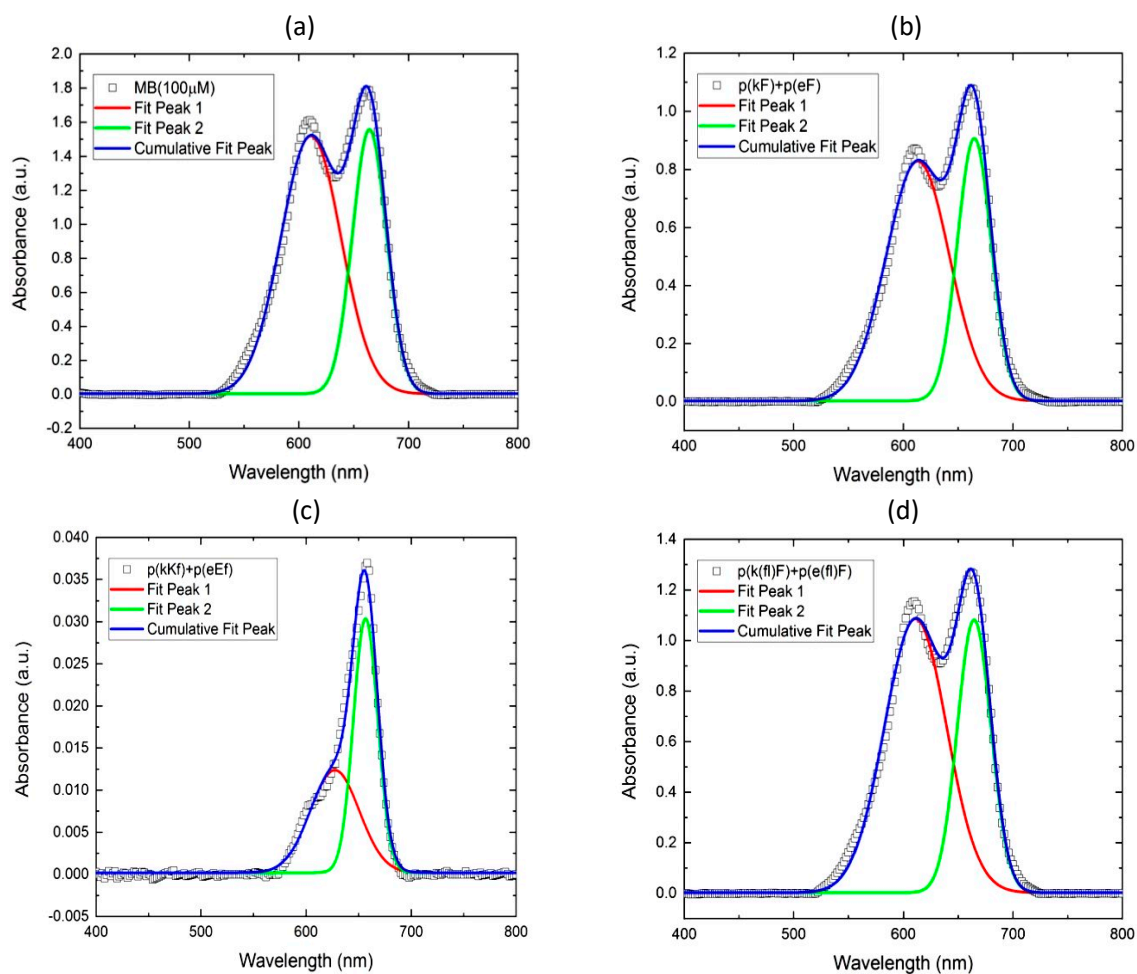

**Figure S8.** Deconvolution of the UV-vis spectra of methylene blue in aqueous solution and in the supernatant phase of complexes: (a) Methylene blue solution (MB); (b)  $p(kF)+p(eF)$ ; (c)  $p(kKf)+p(eEf)$ ; (d)  $p(k(fl)F)+p(e(fl)F)$ .

**Table S2.** Deconvolution analysis of UV-vis spectra of methylene blue (MB) in aqueous solution and supernatant solution of sequence pairs.

| Deconvolution results   | MB     | $p(kF)+p(eF)$ | $p(kKf)+p(eEf)$ | $p(k(fl)F)+p(e(fl)F)$ |
|-------------------------|--------|---------------|-----------------|-----------------------|
| Area at around 612 nm   | 104.32 | 59.6          | 0.71            | 76.9                  |
| Area at around 662 nm   | 60.41  | 35            | 0.87            | 41.7                  |
| Total area for monomers | 269.05 | 154.2         | 2.29            | 195.5                 |

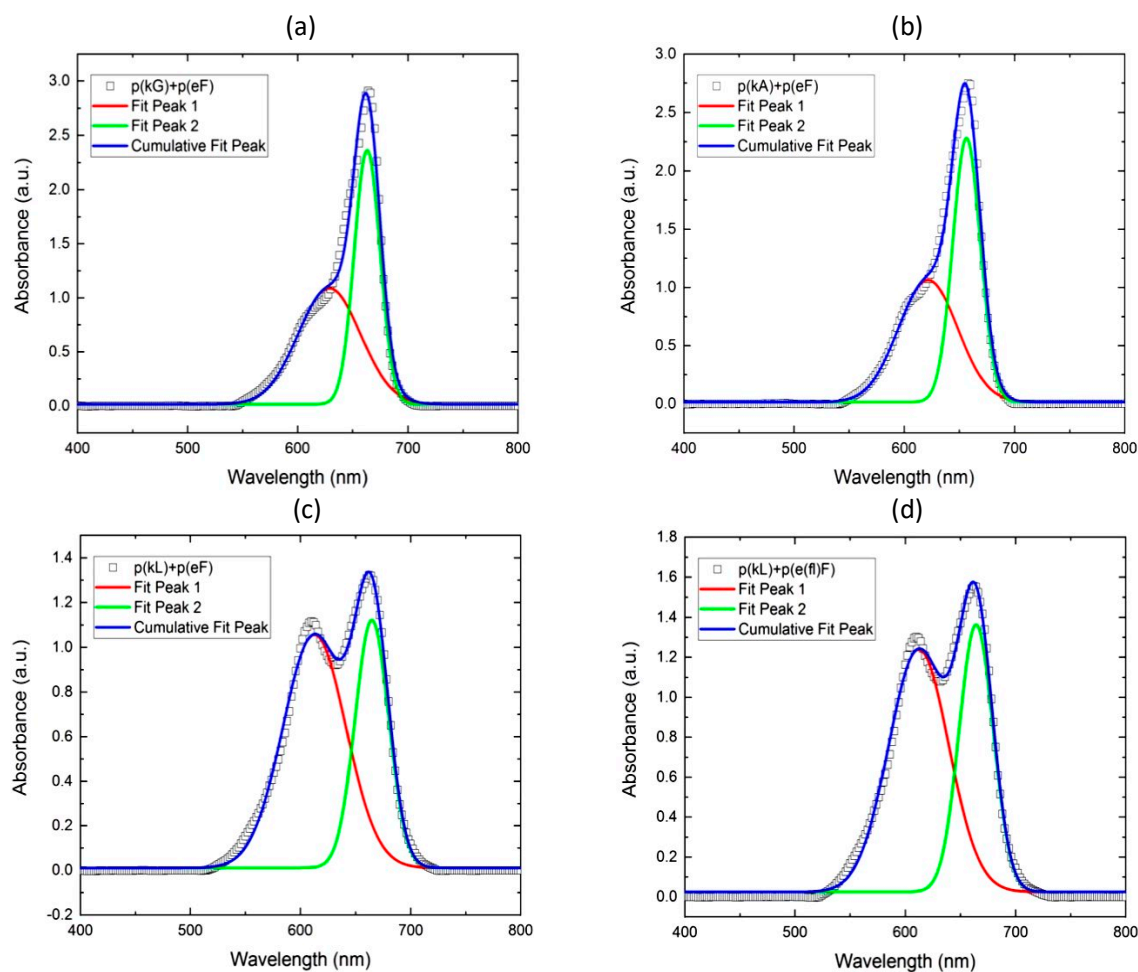

**Figure S9.** Deconvolution of the UV-vis spectra of methylene blue in aqueous solution and in the supernatant phase of complexes: (a)  $p(kG)+p(eF)$ ; (b)  $p(kA)+p(eF)$ ; (c)  $p(kL)+p(eF)$ ; (d)  $p(kL)+p(e(f)F)$ .

**Table S3.** Deconvolution analysis of UV-vis spectra of methylene blue (MB) in aqueous solution and supernatant solution of sequence pairs.

| Deconvolution results   | $p(kG)+p(eF)$ | $p(kA)+p(eF)$ | $p(kL)+p(eF)$ | $p(kL)+p(e(f)F)$ |
|-------------------------|---------------|---------------|---------------|------------------|
| Area at around 612 nm   | 76            | 70.44         | 74.55         | 82.64            |
| Area at around 662 nm   | 68.48         | 71            | 42.38         | 51.72            |
| Total area for monomers | 220.48        | 211.88        | 191.48        | 217              |

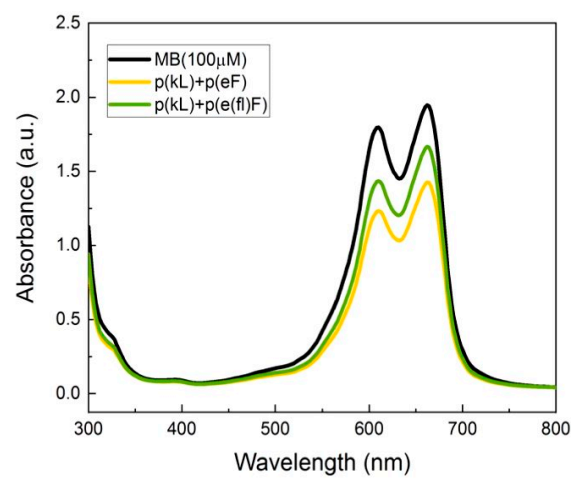

**Figure S10.** UV-vis spectra of MB in aqueous solution and in the supernatant phase of p(kL)+p(eF) and p(kL)+p(e(f)F).
